# Supplementary material for: A heterozygous LAMA5 variant may contribute to slowly progressive, vinculin-enhanced familial FSGS and pulmonary defects
Source: JCI Insight. 2022 Dec 8;7(23):e158378. doi: 10.1172/jci.insight.158378 (PMC9746903; doi:10.1172/jci.insight.158378)
Supplement: Supplemental data [file jciinsight-7-158378-s210.pdf]

Supplementary Figures and Tables of

**A heterozygous *LAMA5* variant may contribute to slowly progressive, vinculin-enhanced familial FSGS and pulmonary defects.**

Running title: A heterozygous laminin  $\alpha 5$  variant causes FSGS

Jun-Ya Kaimori<sup>1,2\*</sup>, Yamato Kikkawa<sup>3\*</sup>, Daisuke Motooka<sup>4,5</sup>, Tomoko Namba-Hamano<sup>2</sup>, Ayako Takuwa<sup>5</sup>, Atsuko Okazaki<sup>6,7</sup>, Kaori Kobayashi<sup>6,8</sup>, Arisa Tanigawa<sup>9</sup>, Yuko Kotani<sup>9</sup>, Yoshihiro Uno<sup>9</sup>, Kazuto Yoshimi<sup>10,11</sup>, Koki Hattori<sup>2</sup>, Yuta Asahina<sup>2</sup>, Sachio Kajimoto<sup>2</sup>, Yohei Doi<sup>2</sup>, Tatsufumi Oka<sup>2</sup>, Yusuke Sakaguchi<sup>1,2</sup>, Tomoji Mashimo<sup>9,10,11,12</sup>, Kiyotoshi Sekiguchi<sup>13</sup>, Akihiro Nakaya<sup>6,14</sup>, Motoyoshi Nomizu<sup>3</sup>, and Yoshitaka Isaka<sup>2</sup>

<sup>1</sup>Department of Inter-Organ Communication Research in Kidney Diseases, Osaka University Graduate School of Medicine

<sup>2</sup>Department of Nephrology, Osaka University Graduate School of Medicine

<sup>3</sup>Department of Clinical Biochemistry, Tokyo University of Pharmacy and Life Sciences

<sup>4</sup>Genome Information Research Center, Research Institute for Microbial Diseases

<sup>5</sup>Immunology Frontier Research Center, Osaka University

<sup>6</sup>Department of Genome Informatics, Osaka University Graduate School of Medicine

<sup>7</sup>Diagnostics and Therapeutics of Intractable Diseases, Intractable Disease Research Center, Graduate School of Medicine, Juntendo University

<sup>8</sup>Medical Solutions Division, NEC Corporation

<sup>9</sup>The Institute of Experimental Animal Sciences, Osaka University Graduate School of Medicine

<sup>10</sup>Genome Editing Research and Development (R&D) Center, Osaka University Graduate School of Medicine

<sup>11</sup>Division of Animal Genetics, Laboratory Animal Research Center, Institute of Medical Science

<sup>12</sup>Division of Genome Engineering, Center for Experimental Medicine and Systems Biology, Institute of Medical Science

<sup>13</sup>Division of Matrixome Research and Application, Institute for Protein Research

<sup>14</sup>Laboratory of Genome Data Science, Graduate School of Frontier Sciences, The University of Tokyo

\*Corresponding authors

normal

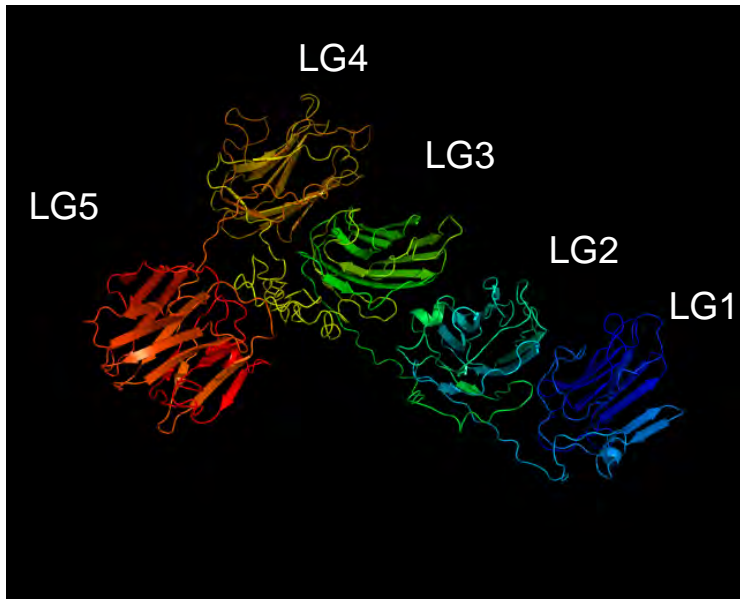

V3687M

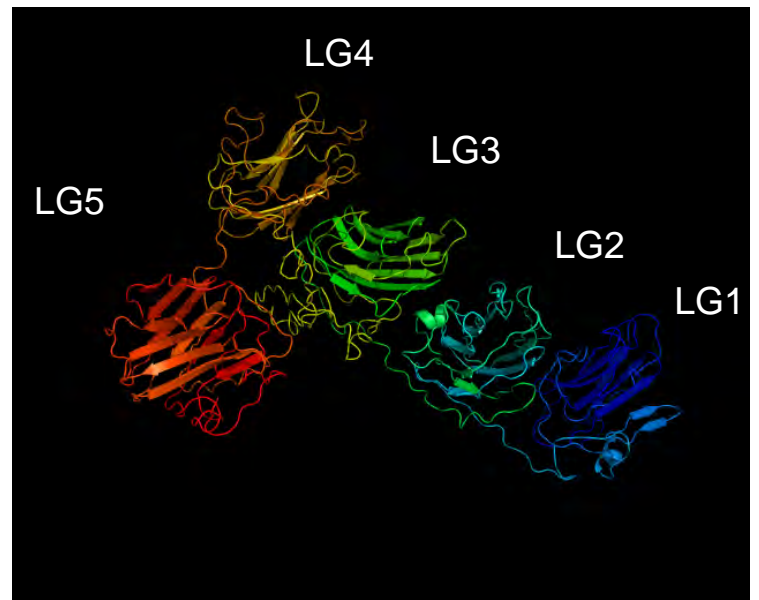

**Supplementary Figure S1. Predicted 3D structures of normal, the variant V3687M laminin  $\alpha 5$  LG1-5 module.**

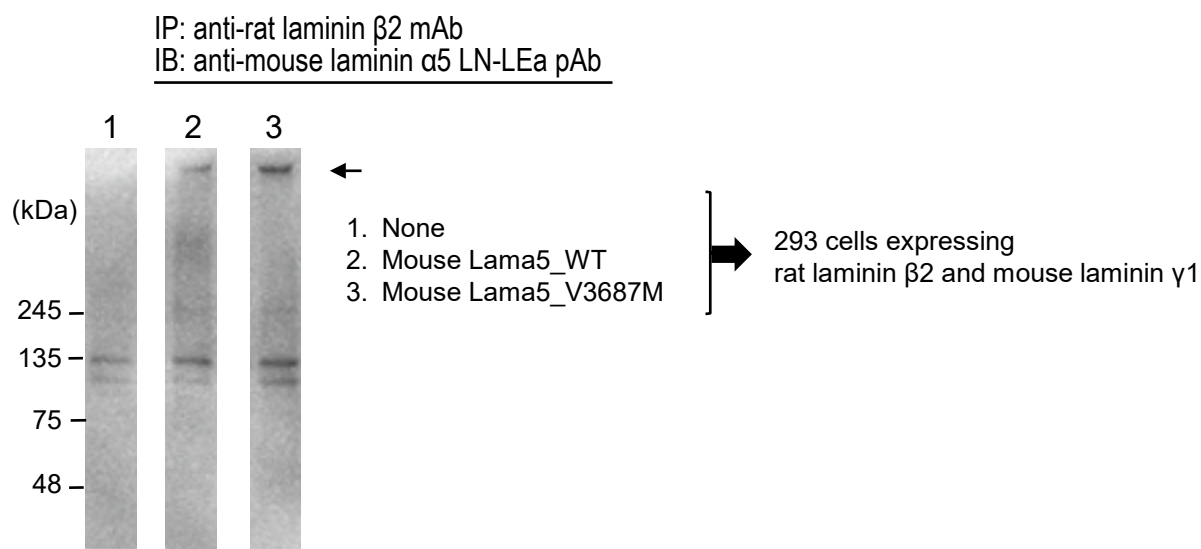

### Supplementary Figure S2. Assembly of mutant proteins into laminin heterotrimers.

Expression vectors of full-length wild-type (lane 2) and mutant laminin  $\alpha$ 5 V3687M (lane 3), G3685R were transiently transfected into the HEK293 cells expressing  $\beta$ 2 and  $\gamma$ 1 chains. Negative control (lane 1). The conditioned media from the cells were used for immunoprecipitation with anti-rat laminin  $\beta$ 2 monoclonal antibody. The immunoprecipitated proteins were separated on 5-20% gel under non-reducing condition and transferred to PVDF membrane. The immune complexes were detected with anti-mouse laminin  $\alpha$ 5 domain LN/LEa polyclonal antibody, as described in following Experimental procedures. The mutant laminin  $\alpha$ 5 chain assembled with  $\beta$ 2 and  $\gamma$ 1 chains as well as wild-type.

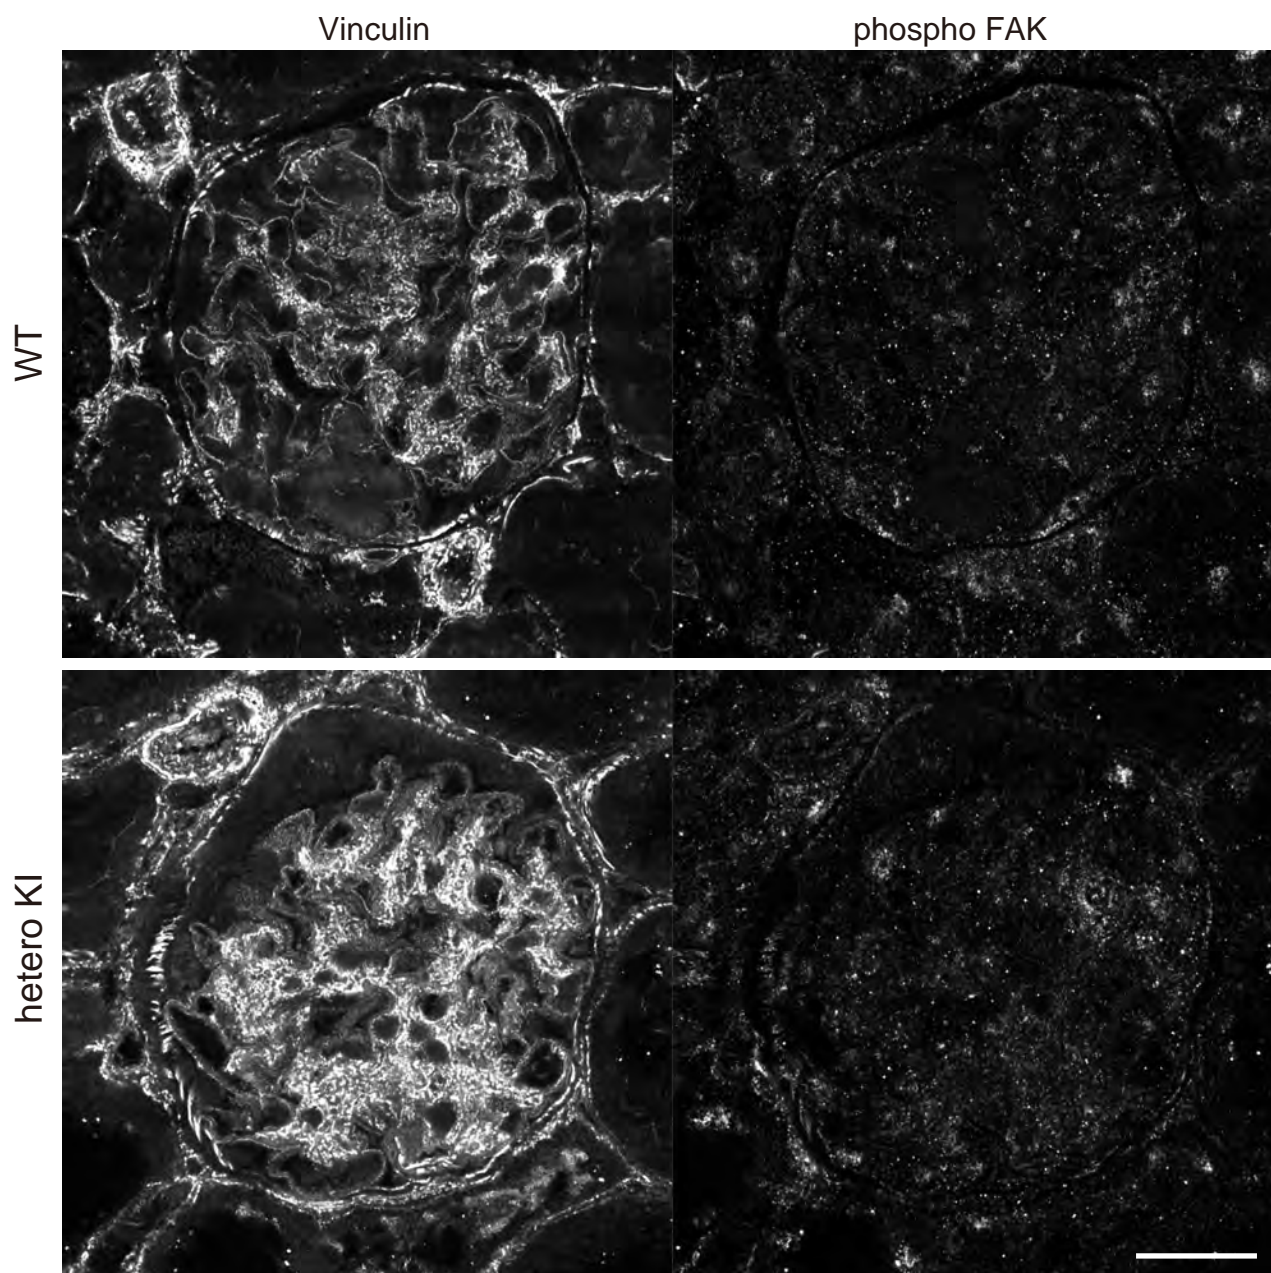

**Supplemenatry Figure S3. Immunofluorescent staining of vinculin and phosphoFAK in kidney glomeruli from WT and heterozygous KI mice. Bar: 20  $\mu$ m.**

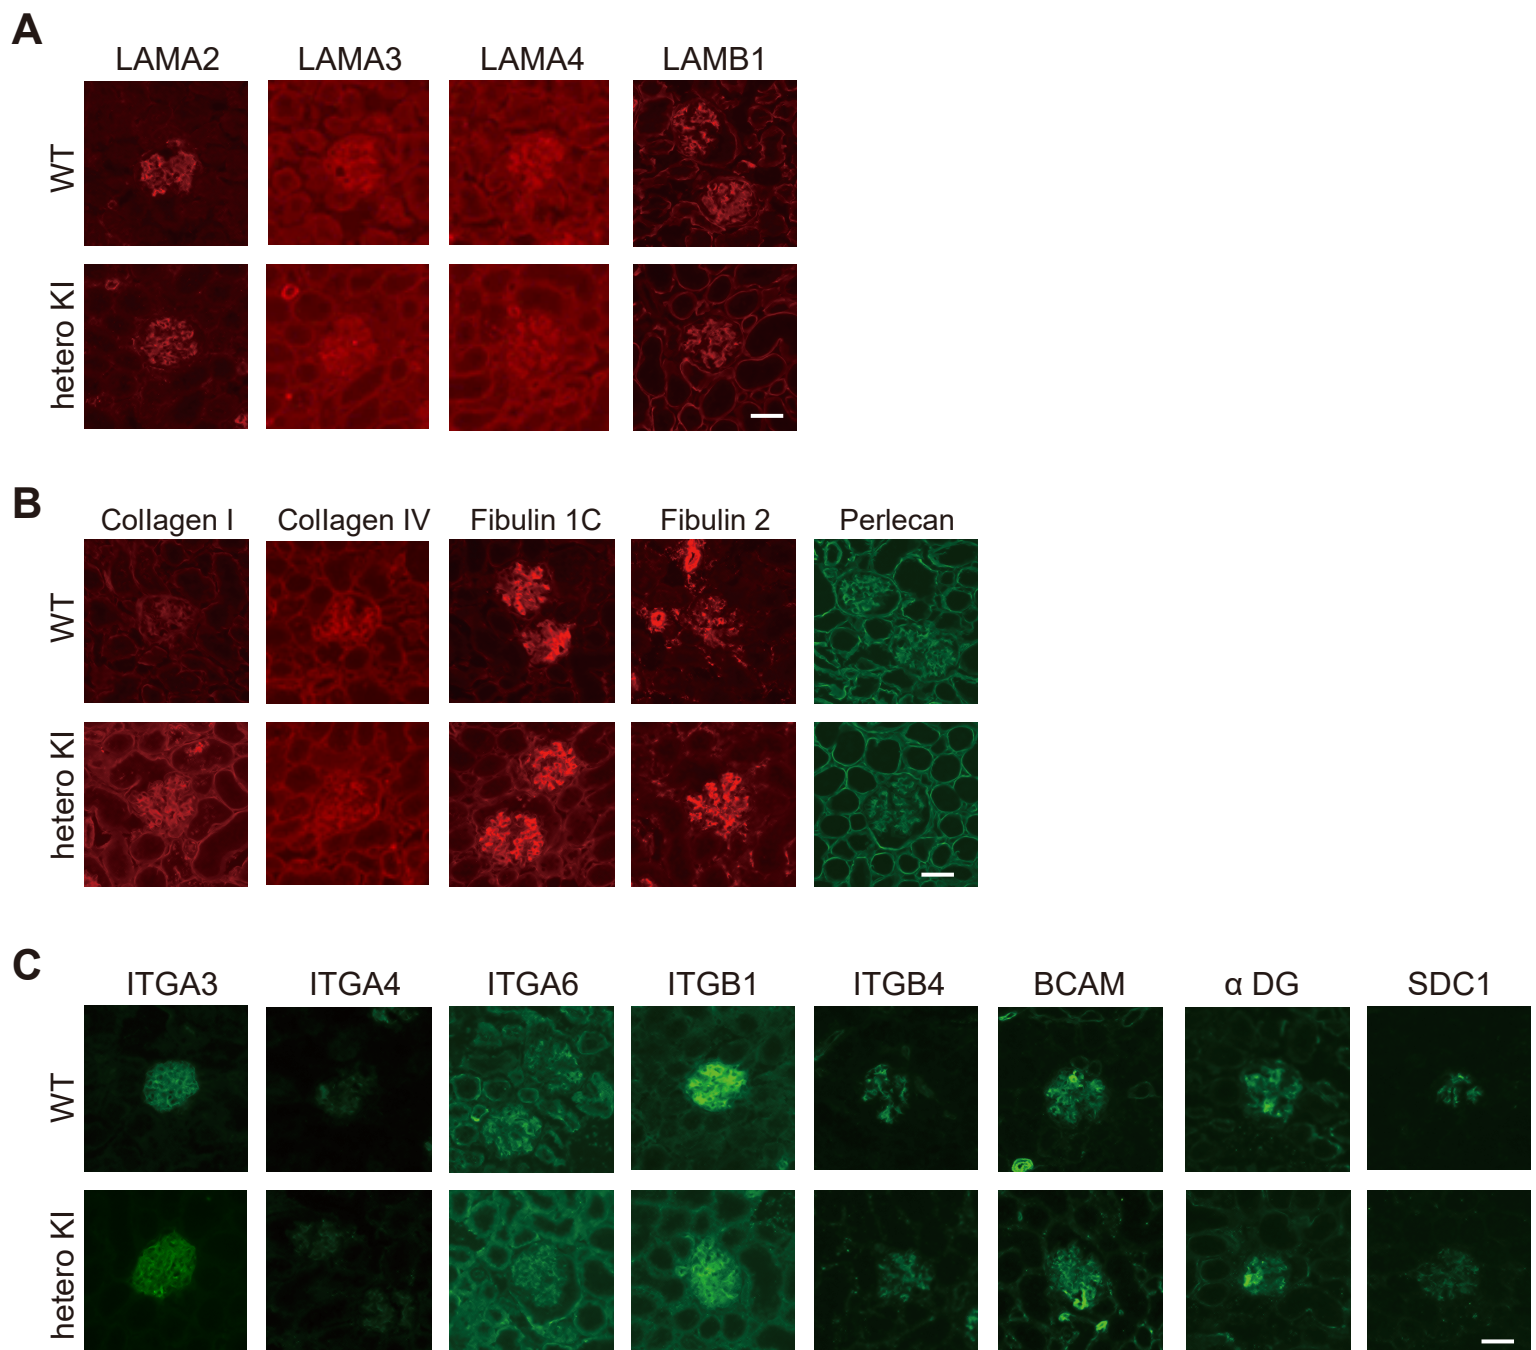

**Supplementary Figure S4. Immunofluorescence staining images of other chains of laminin, other components of extra cellular matrix and receptors for laminin  $\alpha$ 5 in kidney.** Immunofluorescence staining images of chains of laminin (A), components of ECM (B) and receptors for laminin  $\alpha$ 5 (C) in kidney glomeruli from WT and heterozygous KI mice. Bar: 20  $\mu$ m.

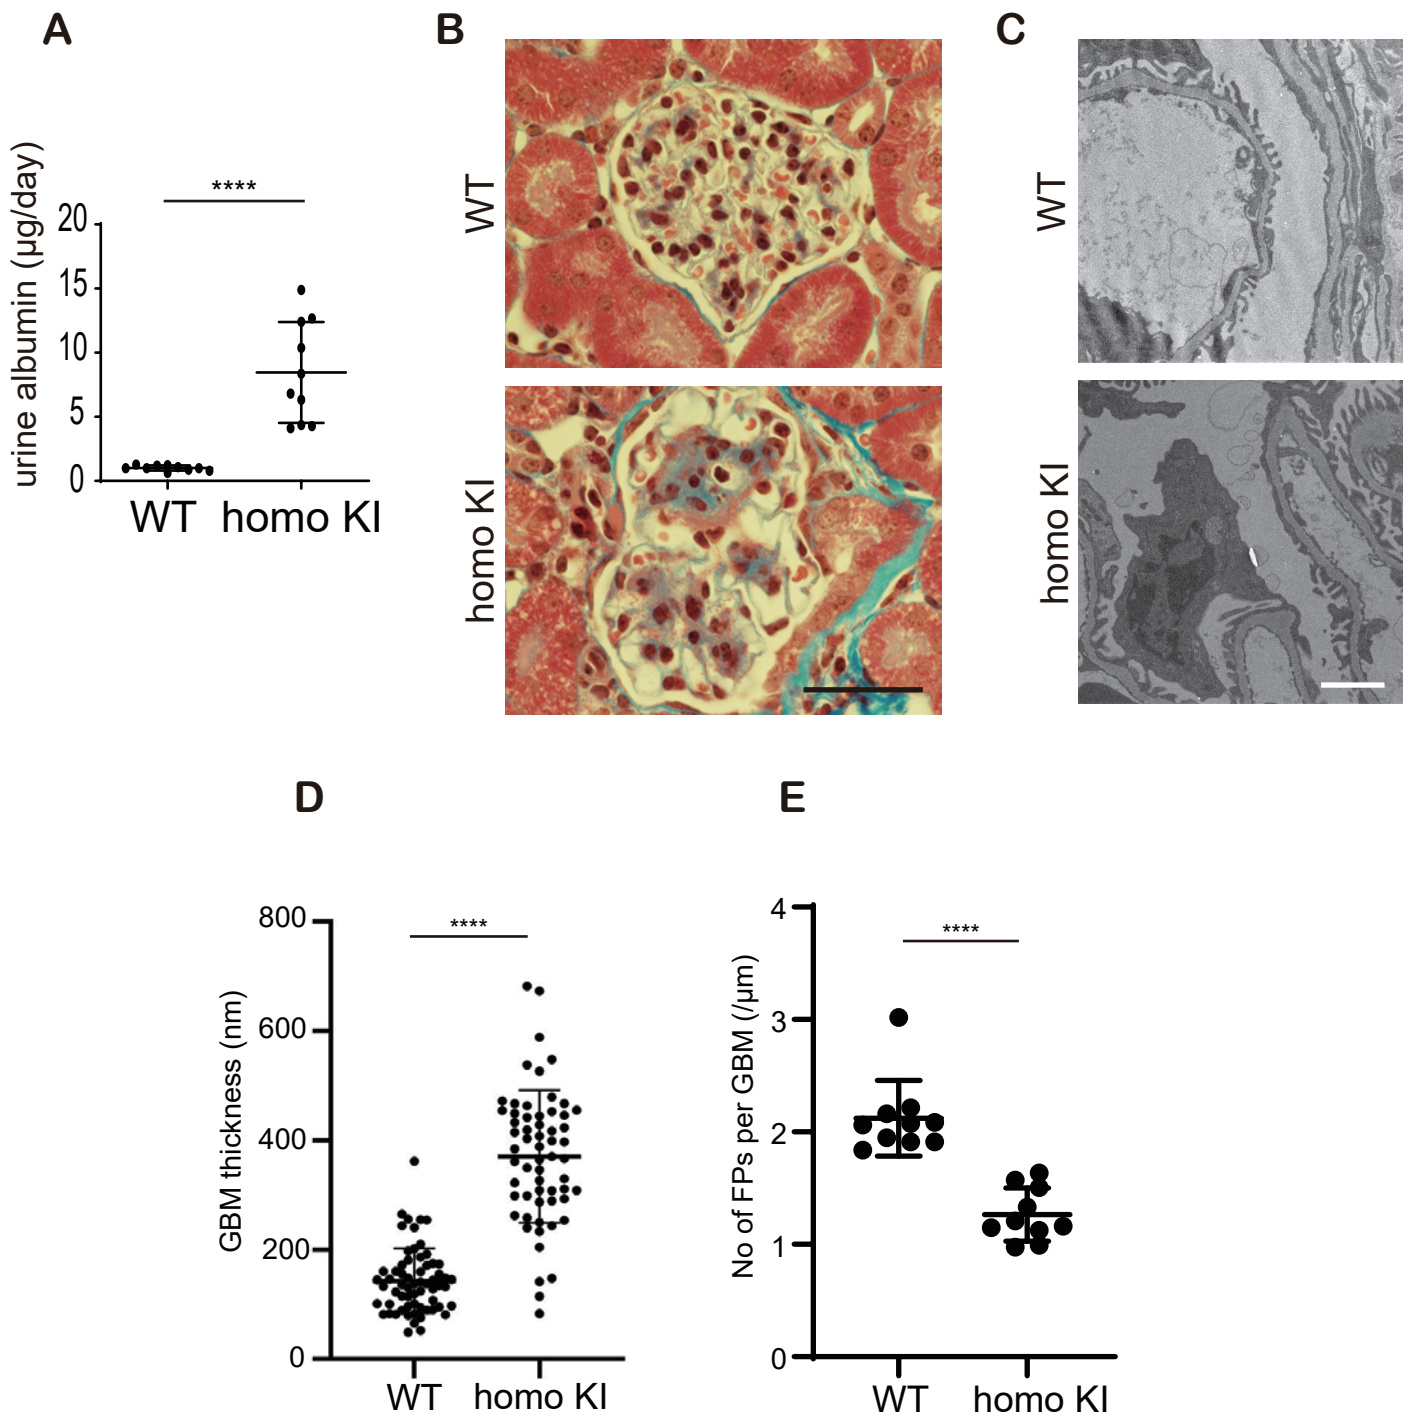

**Supplementary Figure S5. Renal phenotypes of homozygous V3684M KI mice at 16 weeks of age.** (A) Urine albumin excretion per day of WT and homozygous V3684M KI mice at 16 weeks of age. \*\*\*\*:  $p < 0.0001$ ; Mann–Whitney U test. (B) Masson’s trichrome staining images of kidney tissues from WT and V3684M KI mice. Bar:  $20\mu\text{m}$ . (C) Electron micrographs of GBM from WT and heterozygous KI mice. Bar:  $2\mu\text{m}$ . (D) GBM thickness of WT and homozygous V3684M KI mice at 16 weeks of age. \*\*\*\*:  $p < 0.0001$ ; Mann–Whitney U test. (E) Number of foot processes per GBM length in WT and homozygous V3684M KI mice at 16 weeks of age. \*\*\*\*:  $p < 0.0001$ ; Mann–Whitney U test.

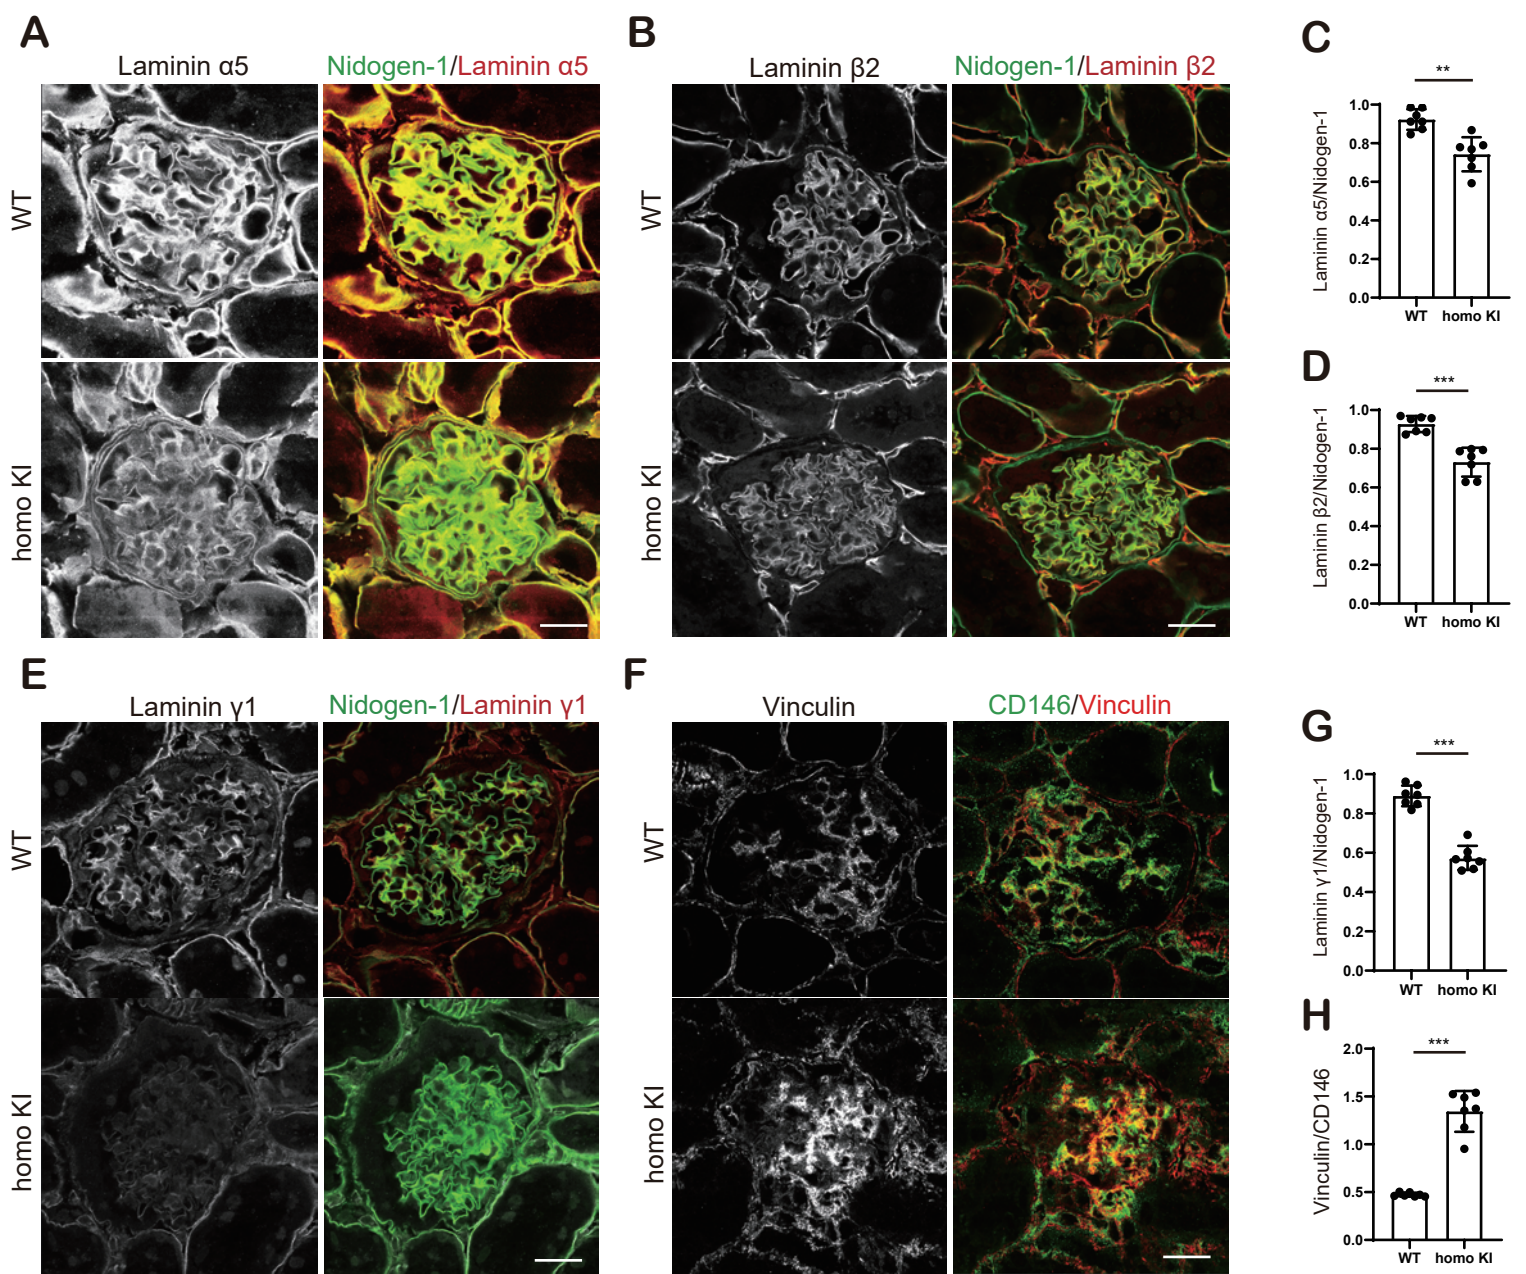

**Supplementary Figure S6. Protein expression of laminin  $\alpha 5$ ,  $\beta 2$ ,  $\gamma 1$  and vinculin in the glomeruli in homozygous V3684M KI mice at 16 weeks of age.** Immunofluorescence staining images of laminin  $\alpha 5$  (A),  $\beta 2$  (B),  $\gamma 1$  (E) and nidogen-1 in kidney glomeruli from WT and homozygous KI mice. Bar: 20  $\mu$ m. Quantification of laminin  $\alpha 5$  (C),  $\beta 2$  (D),  $\gamma 1$  (G) relative to nidogen-1 intensity in the glomerular area. Mean fluorescence intensity of each stain was calculated by Zen software. \*\*:  $p < 0.01$ , \*\*\*:  $p < 0.001$ ; Mann–Whitney U test. (F) Immunofluorescence staining images of CD146 and vinculin in kidney glomeruli from WT and homozygous KI mice. Bar: 20  $\mu$ m. (H) Quantification of vinculin relative to CD146 intensity in the glomerular area. \*\*\*:  $p < 0.001$ ; Mann–Whitney U test.

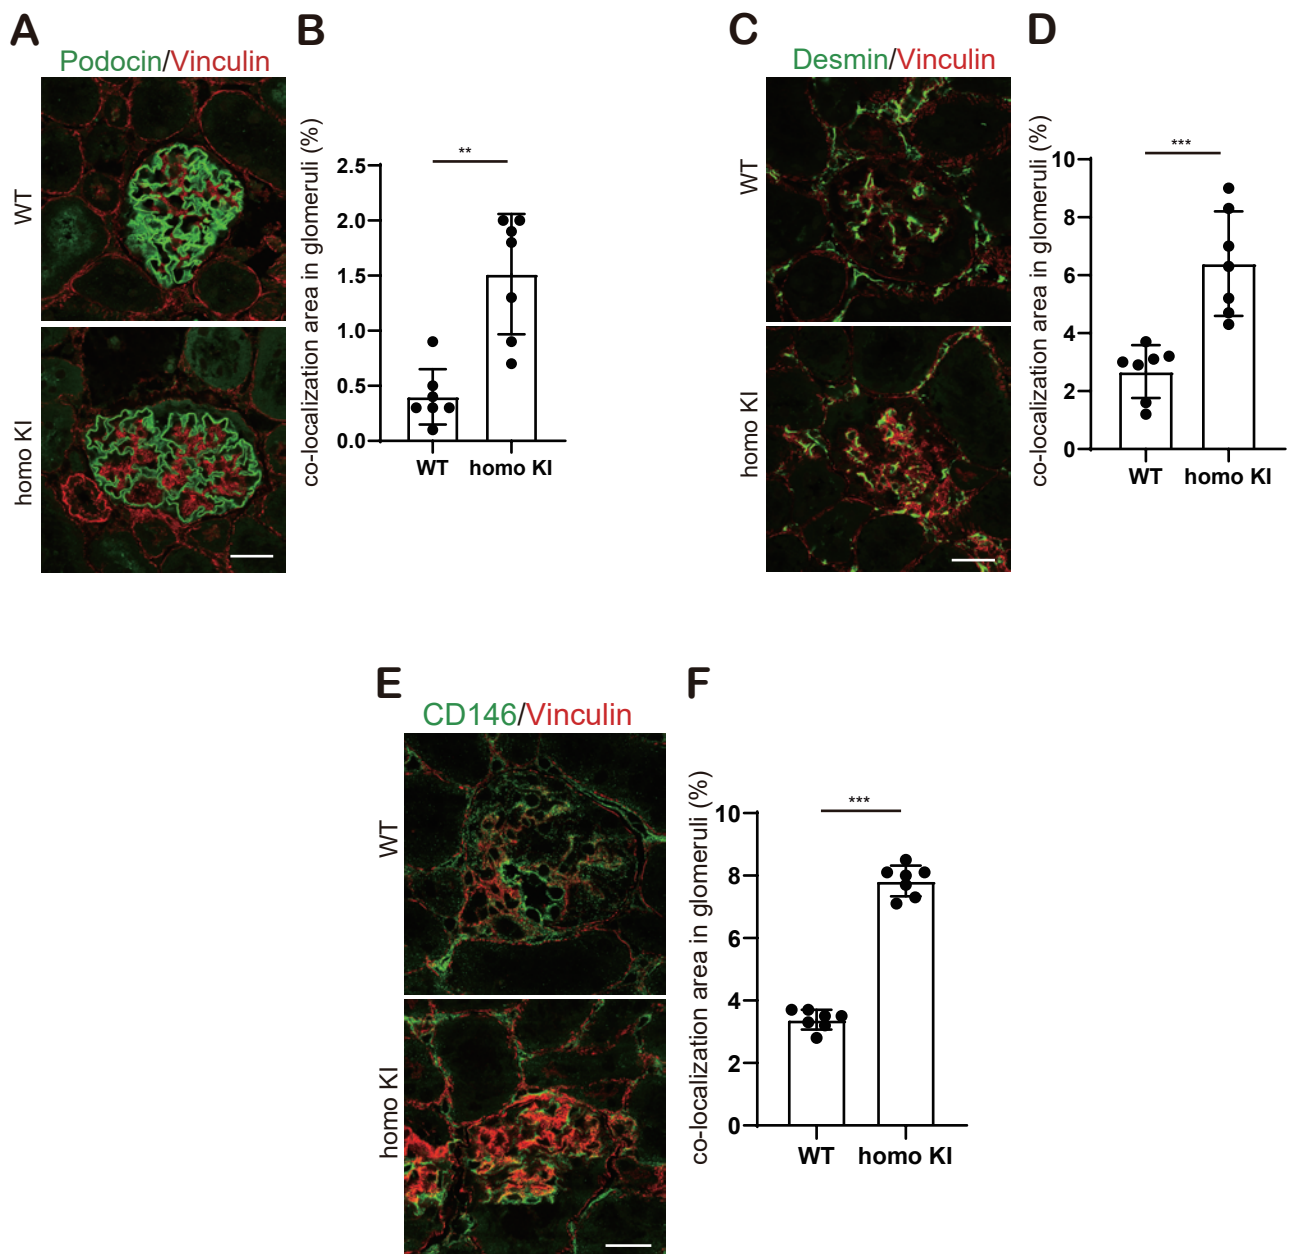

**Supplementary Figure S7. Increased vinculin localization in various glomerular components of homozygous V3684M KI mice at 16 weeks of age.** (A) Immunofluorescence staining images of podocin and vinculin in kidney glomeruli from WT and homozygous KI mice. Bar: 20  $\mu$ m. (B) Quantification of vinculin and podocin co-localization area per glomerular area. \*\*:  $p < 0.01$ ; Mann–Whitney U test. (C) Immunofluorescence staining images of desmin and vinculin in kidney glomeruli from WT and homozygous KI mice. Bar: 20  $\mu$ m. (D) Quantification of vinculin and desmin co-localization area per glomerular area. \*\*\*:  $p < 0.001$ ; Mann–Whitney U test. (E) Immunofluorescence staining images of CD146 and vinculin in kidney glomeruli from WT and homozygous KI mice. Bar: 20  $\mu$ m. (F) Quantification of CD146 and desmin co-localization area per glomerular area. \*\*\*:  $p < 0.001$ ; Mann–Whitney U test.

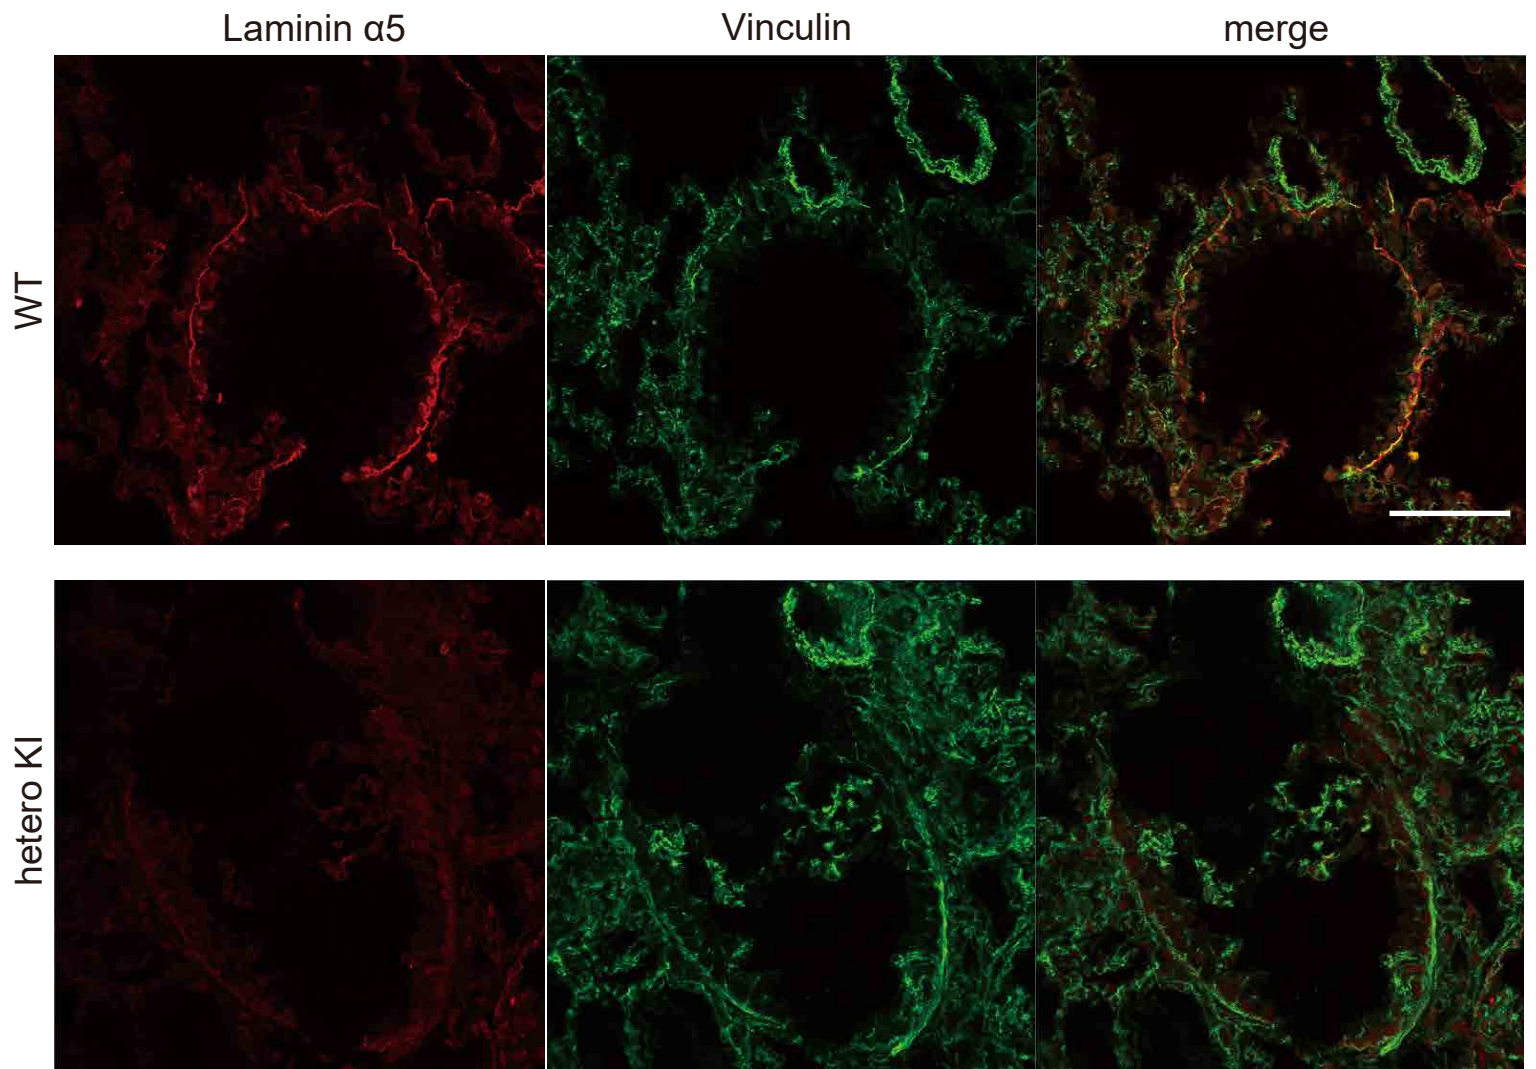

**Supplementary Figure S8. Co-immunostaining of laminin  $\alpha 5$  and vinculin in lung tissues from WT and heterozygous KI mice.** The reduction of laminin  $\alpha 5$  and the increase of vinculin in the lung tissue from a heterozygous mouse were observed in the merged images. Bar: 50  $\mu\text{m}$ .

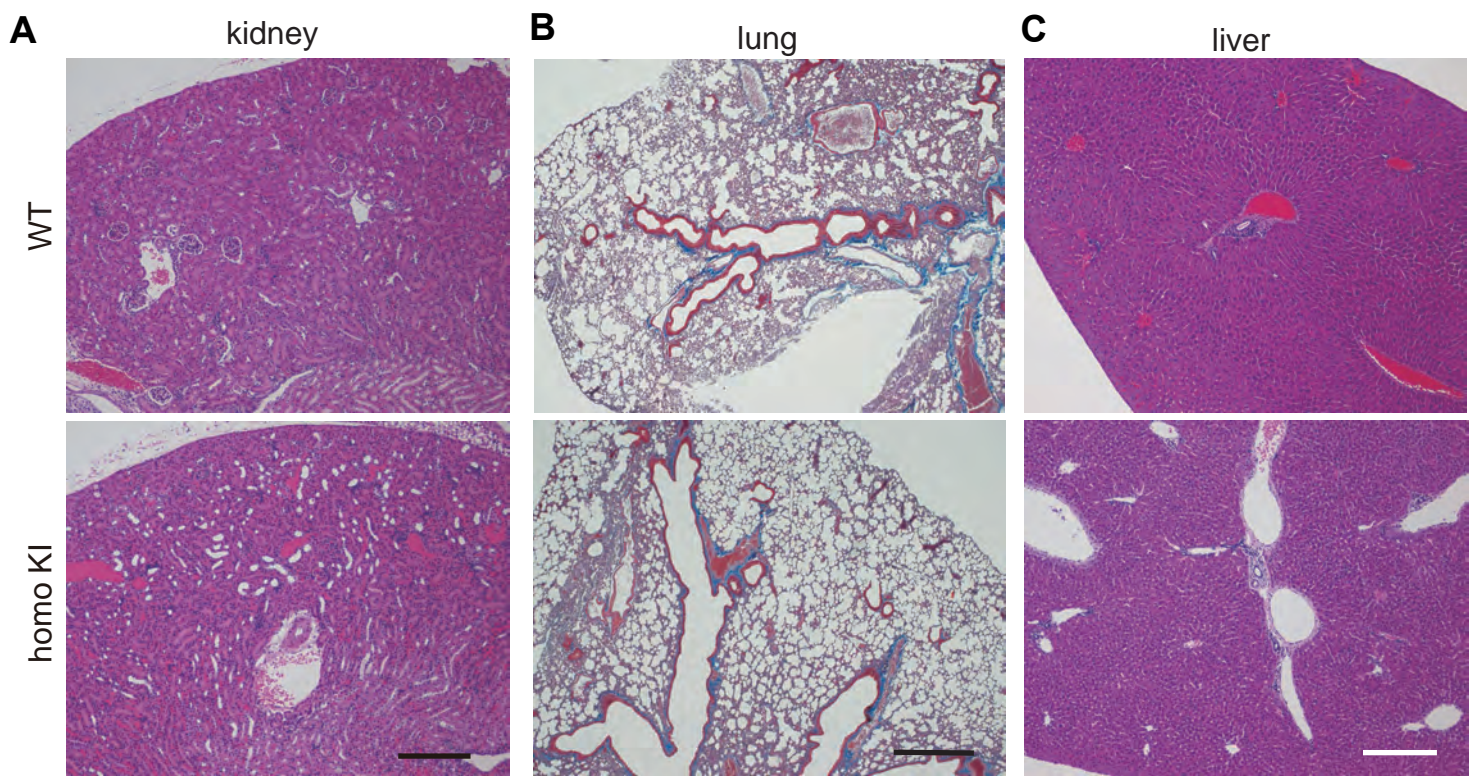

**Supplementary Figure S9. Systemic phenotypes of homozygous V3684M KI mice at 16 weeks of age.** (A) Lower magnified images of HE staining of kidney tissues from WT and homozygous V3684M KI mice at 16 weeks of age. Dilated tubules and veins were observed. Bar:1000  $\mu$ m. (B) Lower magnified images of Masson's trichrome staining of lung tissues from WT and homozygous V3684M KI mice. Dilated bronchial tubes and enlarged alveolar area were observed in the lung tissue from homozygous KI mice at 16 weeks of age. Bar: 1000  $\mu$ m. (C) Lower magnified images of HE staining of liver tissues from WT and homozygous V3684M KI mice at 16 weeks of age. Dilated veins were observed. Bar:1000  $\mu$ m.

**A**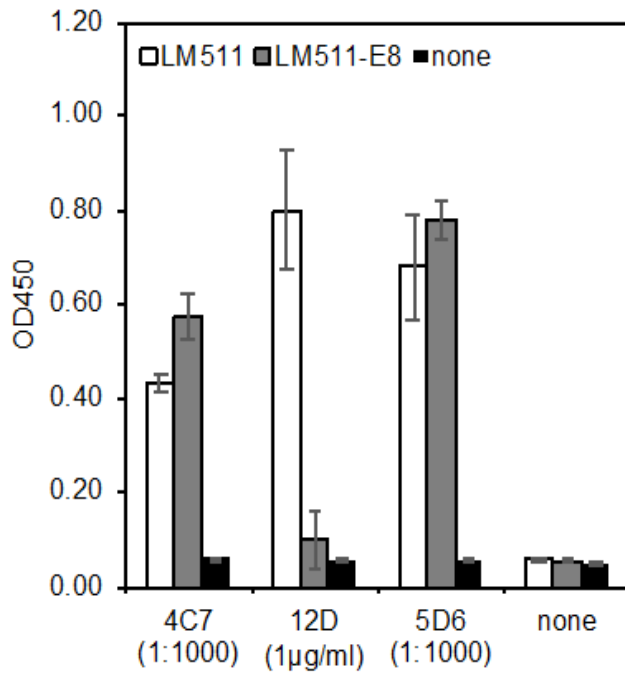**B**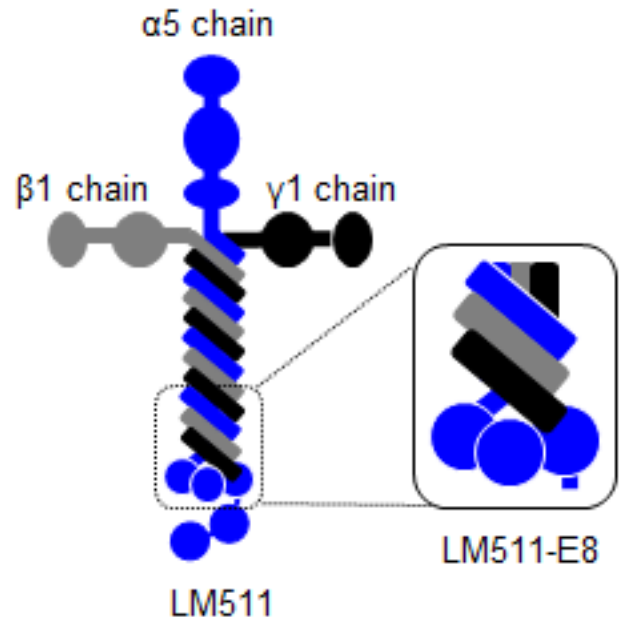

**Supplemental Figure S10. Epitope mapping of monoclonal antibodies against human laminin  $\alpha 5$  chain.** (A) Ninety-six-well ELISA plates were coated with whole molecule and E8 fragment of laminin-511. ELISA demonstrates that the epitopes of 5D6 and 4C7 monoclonal antibodies were localized in the E8 fragment of laminin-511. The 5D6 antibody is not recognized  $\alpha 5$ LG4-5 in which the mutation is located. (B) The schematic presentation of LM511 molecule.

segment 1

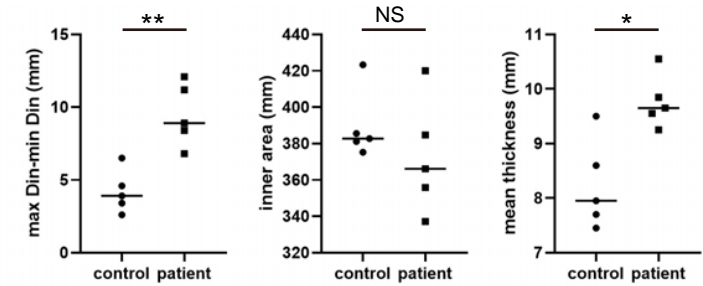

segment 2

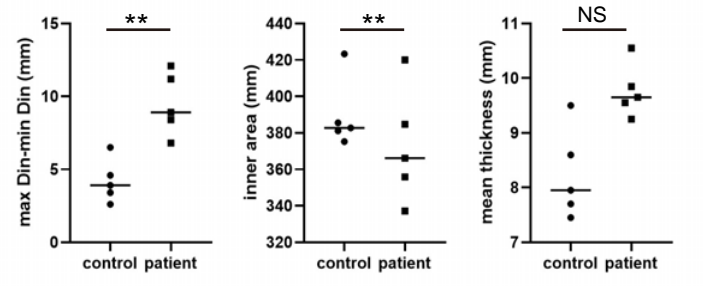

segment 3

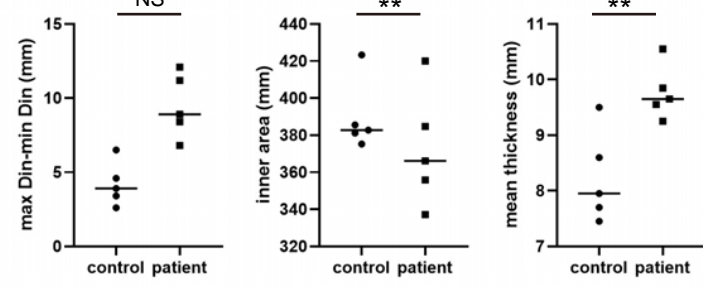

segment 4

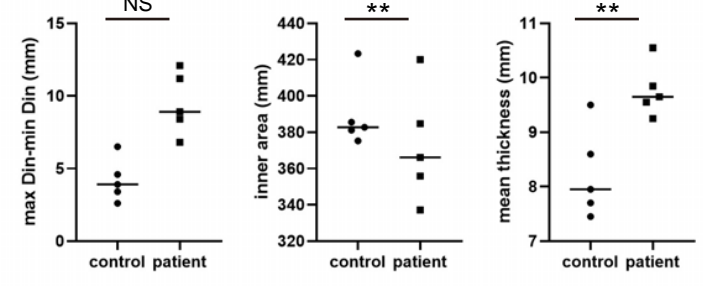

segment 5

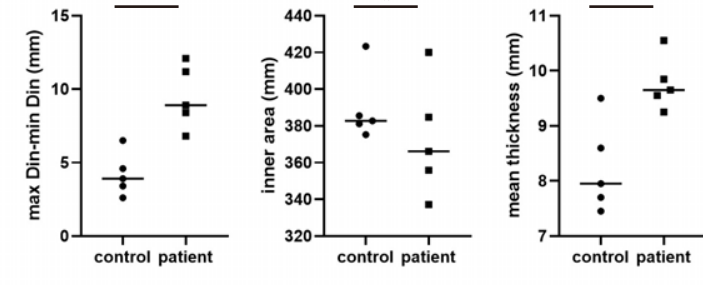

segment 6

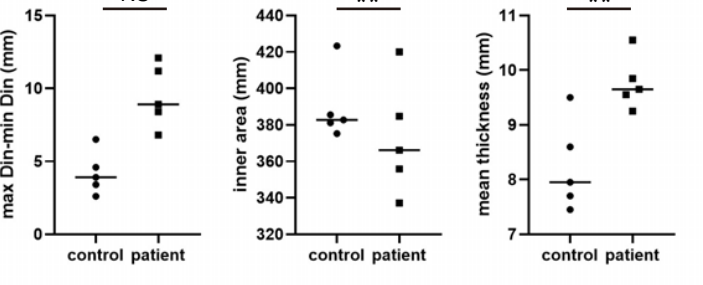

segment 7

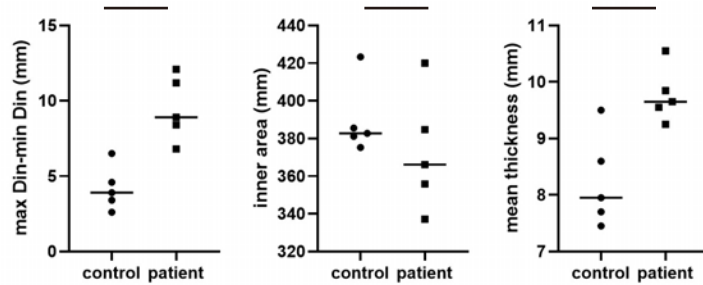

**Supplemental Figure S11. Measured data and stastical analyses in detailed 3D analyses of bronchial tubes using patient chest CT.** NS: not significant. \*: P<0.05, \*\*P<0.01, Mann-Whitney test.

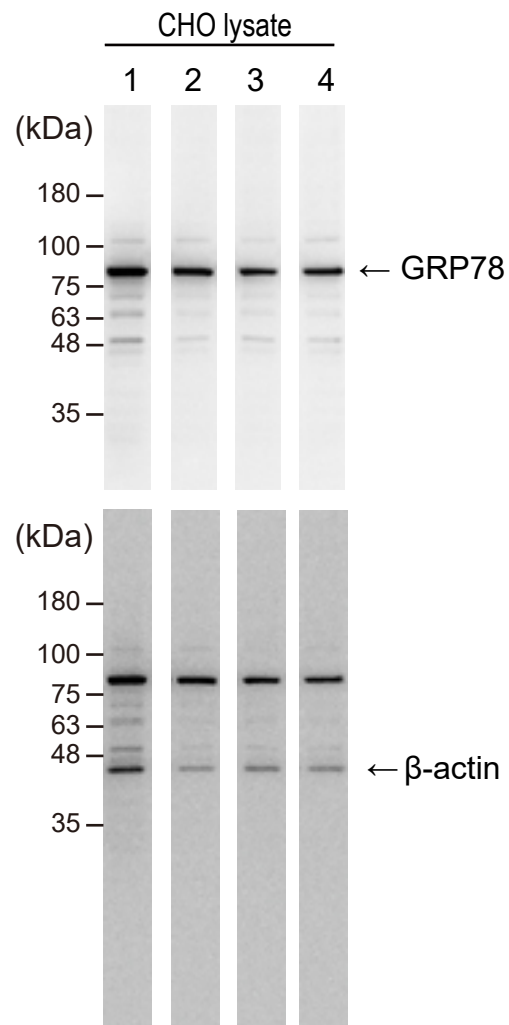

**Supplementary Figure S12. Expression of GRP78 in CHO-K1 transfectants.**

Upper panel: Cell lysates of transfectants expressing wild type (lane 3) and Mutant V3687M (lane 4)  $\alpha 5\text{LG4-5}$ /Fc-SNAP fusion proteins were applied to immunoblot analysis. Negative control and Fc-SNAP protein (lane 1 and 2). Lower panel:  $\beta$ -actin was used as internal control.

glomerulus

WT

hetero KI

GRP78/DAPI

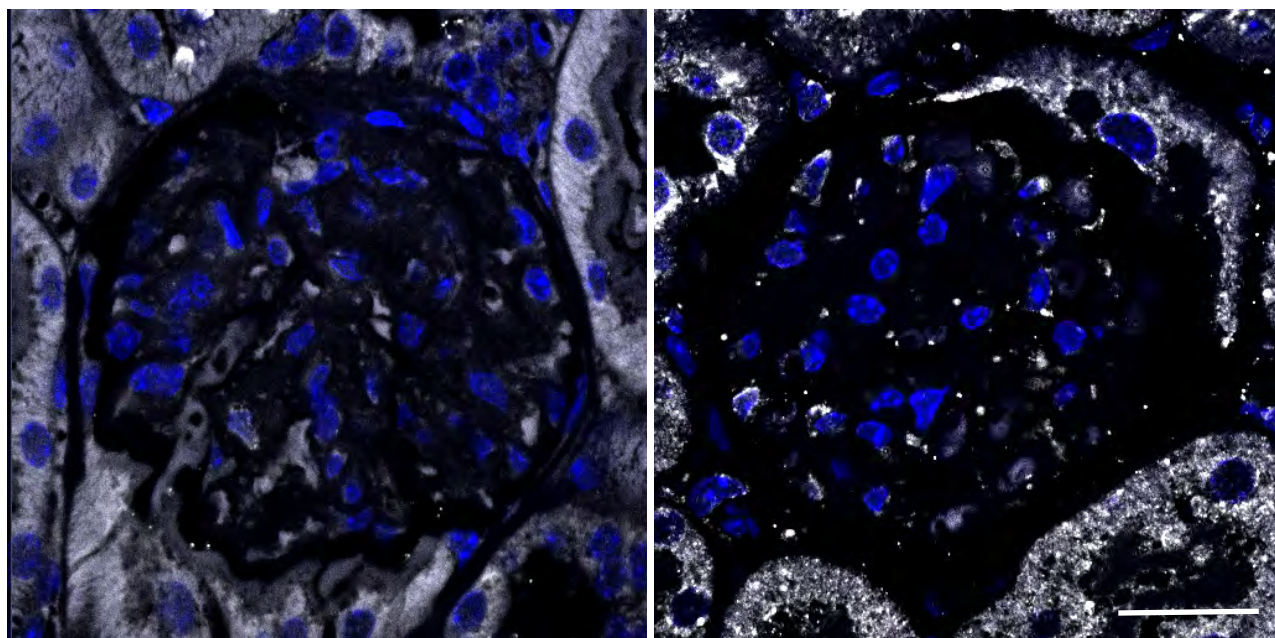

bronchus

WT

hetero KI

GRP78

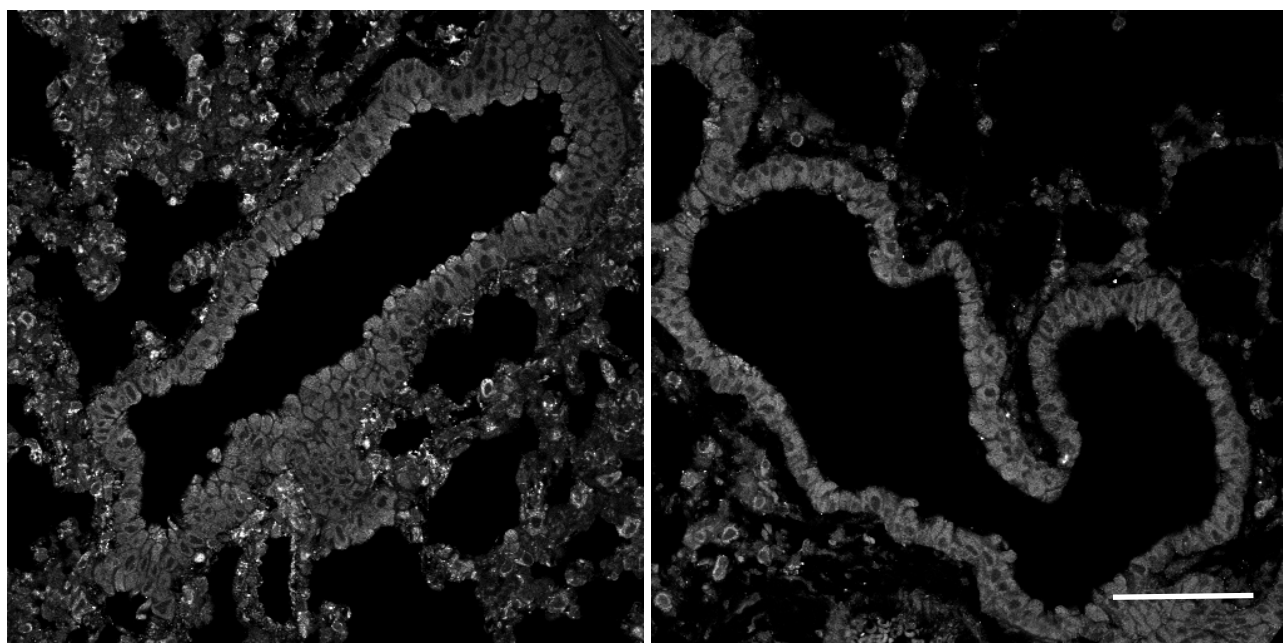

**Supplementary Figure S13. ER stress marker, GRP78 staining in WT and heterozygous V3684M KI mice glomeruli and bronchial epithelium.**

Bars: 20  $\mu$ m.

**Supplementary Table S1. Whole exome sequence data summary.**

|                                                  | I-1           | I-2           | II-1          | II-2          | all  |
|--------------------------------------------------|---------------|---------------|---------------|---------------|------|
| average of DP in 54 variants                     | 80.89         | 40.04         | 69.30         | 76.07         | 66.6 |
| raw data(bp)                                     | 3,666,827,500 | 3,829,399,100 | 3,248,050,900 | 3,459,781,800 |      |
| trimmed data (bp)                                | 3,663,285,817 | 3,825,621,819 | 3,244,881,459 | 3,456,358,232 |      |
| %mapped reads(paired)                            | 99.93%        | 99.93%        | 99.94%        | 99.93%        |      |
| called variant number per sample                 | 458373        | 468753        | 423643        | 444353        |      |
| rare variant number (MAF<0.1%) per sample        | 408           | 440           | 491           | 461           |      |
| patient unique rare variant number<br>(MAF<0.1%) | 54            |               |               |               |      |

**Supplementary Table S2. The 49 candidate genes with 54 rare variants (MAF<0.1%) unique to patients.**

|              |        |
|--------------|--------|
| MAST2        | HNRNPM |
| ABCA4        | IQC�   |
| S100A7A      | DMKN   |
| NES          | HRC    |
| EDEM3        | MYH14  |
| TPO          | ZNF534 |
| BABAM2       | SLX4IP |
| ZNF806       | NKX2-2 |
| TTN          | RIPOR3 |
| GLS          | LAMA5  |
| COPS9        | ASMTL  |
| CROCC2       | ARSD   |
| PIGG         | LITAF  |
| MFSD10       | PIEZO1 |
| LINC01096    | AMDHD2 |
| ADGRV1       | PTPRF  |
| MZB1         | SEMA6B |
| NT5C3A       |        |
| SEMA3C       |        |
| MTMR9        |        |
| ZC3H3        |        |
| MYORG        |        |
| LOC103908605 |        |
| RAD23B       |        |
| LAMC3        |        |
| RXRA         |        |
| RBM20        |        |
| PTPRE        |        |
| GUCY2EP      |        |
| DGKH         |        |
| SPTBN5       |        |
| APH1B        |        |
| AMDHD2       |        |

**Supplementary Table S3. Whole genome sequence data summary.**

|                                                               | I-2             | II-1            | II-2            |
|---------------------------------------------------------------|-----------------|-----------------|-----------------|
| raw data (bp)                                                 | 110,618,535,986 | 110,807,157,636 | 112,581,321,566 |
| trimmed data (bp)                                             | 109,623,934,816 | 109,702,226,167 | 111,321,817,446 |
| %mapped reads (paired)                                        | 98.8%           | 98.9%           | 98.8%           |
| called variant number per sample                              | 5118967         | 5131260         | 5152632         |
| called variant number per sample on <i>LAMA5</i>              | 234             | 216             | 225             |
| rare variant number (MAF<0.5%) per sample on <i>LAMA5</i>     | 14              | 12              | 13              |
| patient unique rare variant number (MAF<0.5%) on <i>LAMA5</i> | 12              |                 |                 |

| Antibody to            | Epitope              | Clone/Lot   | Host/Antigen Species    | Ig class     | Source/Reference                    | Applica tion |
|------------------------|----------------------|-------------|-------------------------|--------------|-------------------------------------|--------------|
| Laminin $\alpha 1$     | LN/LEa domain        | 1057+       | Rabbit/Mouse            | -            | <sup>1</sup>                        | IHC          |
| Laminin $\alpha 2$     | LG domain            | $\alpha 2G$ | Rabbit/Human            | -            | <sup>2</sup>                        | IHC          |
| Laminin $\alpha 3$     | LEc domain           | 1110+       | Rabbit/Mouse            | -            | <sup>3</sup>                        | IHC          |
| Laminin $\alpha 4$     | LEc domain           | 1129+       | Rabbit/Mouse            | -            | <sup>4</sup>                        | IHC          |
| Laminin $\alpha 5$     | LEb/L4b              | 8948        | Rabbit/Mouse            | -            | <sup>5</sup>                        | IHC          |
| Laminin $\alpha 5$     | E8 fragment          | 5D6         | Mouse/human             | -            | <sup>6</sup>                        | IHC          |
| Laminin $\beta 1$      | LF domain            | 1065+       | Rabbit/Mouse            | -            | Sasaki T et al, Eur J Biochem, 2002 | IHC          |
| Laminin $\beta 1$      | unknown              | 2AB1-IA10   | Rat/Mouse               | purified IgG | ATCC, Manassas, VA                  | IHC          |
| Laminin $\beta 2$      | LF domain            | 1117+       | Rabbit/Mouse            | -            | <sup>7</sup>                        | IHC          |
| Laminin $\gamma 1$     | LN/LEa domain        | 1083+       | Rabbit/Mouse            | -            | Sasaki T, Oita University           | IHC          |
| Perlecan               | unknown              | A7L6        | Rat/Mouse               | IgG2a        | abcam, Cambridge, UK                | IHC          |
| Nidogen-1              | unknown              | ELM1        | Rat/Mouse               | IgG2a        | Merck, Kenilworth, NJ               | IHC          |
| Fibulin-1C             | unknown              | 1034+       | Rabbit/Mouse            | -            | <sup>8</sup>                        | IHC          |
| Fibulin-2              | unknown              | 1028+       | Rabbit/Mouse            | -            | <sup>8</sup>                        | IHC          |
| Collagne I             | unknown              | ab34710     | Rabbit/Human and bovine | -            | abcam, Cambridge, UK                | IHC          |
| Collagne IV            | unknown              | ab6586      | Rabbit/Human and bovine | -            | abcam, Cambridge, UK                | IHC          |
| Collagen IV $\alpha 5$ | SKPQSETL             | H52         | Rat/Human               | -            | Chondrex, Woodinville, WA           | IHC          |
| Integrin $\alpha 3$    | Extracellular domain | 2A10        | Rat/Mouse               | IgG2a        | Mekada E, Osaka University          | IHC          |
| Integrin $\alpha 4$    | Extracellular domain | R1-2        | Rat/Mouse               | IgG2b        | BioLegend, San Diego, CA            | IHC          |
| Integrin $\alpha 6$    | Extracellular domain | GoH3        | Rat/Mouse               | IgG2a        | BD Bioscience, Franklin Lakes, NJ   | IHC          |
| Integrin $\beta 1$     | Extracellular domain | 1D7         | Rat/Mouse               | IgG2a        | Mekada E, Osaka University          | IHC          |
| Integrin $\beta 4$     | Extracellular domain | 346-11A     | Rat/Mouse               | IgG2a        | BD Bioscience, Franklin Lakes, NJ   | IHC          |
| Lutheran/BCAM          | Extracellular domain | 10-5        | Rat/Mouse               | IgG2a        | <sup>9</sup>                        | IHC          |
| $\alpha$ -dystroglycan | Extracellular domain | 3D7         | Rat/Mouse               | IgG2a        | Merck, Kenilworth, NJ               | IHC          |
| Syndecan-1             | Extracellular domain | 281-2       | Rat/Mouse               | IgG2a        | BioLegend, San Diego, CA            | IHC          |
| Desmin                 | unknown              | D33         | Mouse/Human             | IgG1         | Santa Cruz, Dallas, TX              | IHC          |
| Desmin                 | C-terminus           | D93F5       | Rabbit/Human            | purified IgG | CST, Danvers, MA                    | IHC          |

|           |                      |           |              |      |                        |     |
|-----------|----------------------|-----------|--------------|------|------------------------|-----|
| Vinculin  | unknown              | hVIN-1    | Mouse/Human  | IgG1 | Merck, Kenilworth, NJ  | IHC |
| Podocin   | C-terminus           | ab50339   | Rabbit/Mouse | -    | abcam, Cambridge, UK   | IHC |
| Podocin   | C-terminus           | HPA049486 | Rabbit/Human | -    | Merck, Kenilworth, NJ  | IHC |
| CD146     | Extracellular domain | m146      | Rabbit/Mouse | -    | <sup>10</sup>          | IHC |
| Bip/GRP78 | C-terminus           | -         | Rabbit/Mouse | -    | abcam, Cambridge, UK   | IB  |
| Bip/GRP78 | N-terminus           | N20       | Goat/Human   | -    | Santa Cruz, Dallas, TX | IHC |

**Supplementary Table S4. Primary antibodies used in this research.**

IHC: immunohistochemistry; IB: immunoblotting

## References

1. Ettner N, Gohring W, Sasaki T, *et al.* The N-terminal globular domain of the laminin alpha1 chain binds to alpha1beta1 and alpha2beta1 integrins and to the heparan sulfate-containing domains of perlecan. *FEBS Lett* 1998; **430**: 217-221.
2. Cheng YS, Champliand MF, Burgeson RE, *et al.* Self-assembly of laminin isoforms. *J Biol Chem* 1997; **272**: 31525-31532.
3. Tunggal L, Ravaux J, Pesch M, *et al.* Defective laminin 5 processing in cylindroma cells. *Am J Pathol* 2002; **160**: 459-468.
4. Sasaki T, Mann K, Timpl R. Modification of the laminin alpha 4 chain by chondroitin sulfate attachment to its N-terminal domain. *FEBS Lett* 2001; **505**: 173-178.
5. Miner JH, Patton BL, Lentz SI, *et al.* The laminin alpha chains: expression, developmental transitions, and chromosomal locations of alpha1-5, identification of heterotrimeric laminins 8-11, and cloning of a novel alpha3 isoform. *J Cell Biol* 1997; **137**: 685-701.
6. Fujiwara H, Kikkawa Y, Sanzen N, *et al.* Purification and characterization of human laminin-8. Laminin-8 stimulates cell adhesion and migration through alpha3beta1 and alpha6beta1 integrins. *J Biol Chem* 2001; **276**: 17550-17558.
7. Sasaki T, Mann K, Miner JH, *et al.* Domain IV of mouse laminin beta1 and beta2 chains. *Eur J Biochem* 2002; **269**: 431-442.
8. Pan TC, Sasaki T, Zhang RZ, *et al.* Structure and expression of fibulin-2, a novel extracellular matrix protein with multiple EGF-like repeats and consensus motifs for calcium binding. *J Cell Biol* 1993; **123**: 1269-1277.
9. Miura Y, Matsui S, Miyata N, *et al.* Differential expression of Lutheran/BCAM regulates biliary tissue remodeling in ductular reaction during liver regeneration. *Elife* 2018; **7**.
10. Hamano N, Kamoshida S, Kikkawa Y, *et al.* Development of Antibody-Modified Nanobubbles Using Fc-Region-Binding Polypeptides for Ultrasound Imaging. *Pharmaceutics* 2019; **11**.

| Protein                                              | Primer    | Sequence (5'-3')                         |
|------------------------------------------------------|-----------|------------------------------------------|
| SNAP-Tag                                             | SNAP01    | GGAATTCGTCTAGACATGGACAAAGACTGCGAAATG     |
|                                                      | SNAP02    | CGCCTAGGCTAACCCAGCCCAGGCTTGCCCAG         |
| Human IgG <sub>1</sub> Fc-Tag                        | Fc01'     | GAGGATCCCGAGGGTGAGTACTAA                 |
|                                                      | Fc04      | GACTCCTAGGCCTTTACCCGGAGACAGGGAGAGGCT     |
| Signal sequence of<br>human laminin $\gamma$ 2 chain | HG2SIG01  | GGGGTACCGCCATGCCTGCGCTCTG                |
|                                                      | HG2SIG02' | CGGGATCCGTCGACGCTAGCACTTCCCTCCTGGAGGTGGC |
| Mouse laminin $\alpha$ 5LG4-<br>5 modules            | LA5G09    | GCTCTAGAGCCCAGCCAGGACCTTGCCTGC           |
|                                                      | LA5G18    | GGGATCCGTTTCCTGAGGGGCATCCGCGCAT          |

**Supplementary Table S5. Primer sets.**
